# Supplementary material for: TCTP is Essential for Cell Proliferation and Survival during CNS Development
Source: Cells. 2020 Jan 6;9(1):133. doi: 10.3390/cells9010133 (PMC7017002; doi:10.3390/cells9010133)
Supplement: Supplementary file 1 [file cells-09-00133-s001.pdf]

## Supplementary Methodology

### Whole Mount In Situ Hybridization

Whole mount in situ hybridization of mouse embryos was carried out essentially as described by Shen et al. (Supplementary Reference 1). The riboprobes for TCTP corresponding to the entire open reading frame of the cDNA were synthesized with a DIG RNA labeling kit (Roche, Indianapolis, IN, USA).

### Supplementary Figure S1

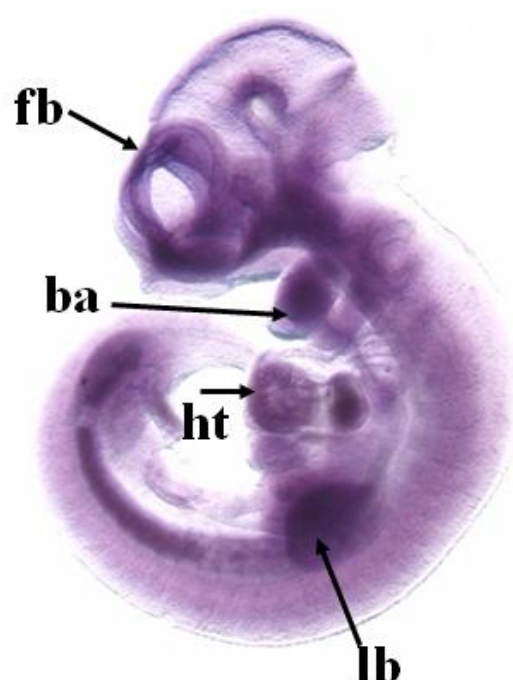

**Supplementary Figure S1.** TCTP RNA expression pattern at mouse embryonic stage 10 (E10.5). Whole-mount in situ hybridization from wild-type mice at E10.5 was carried out using riboprobes specific to *TCTP*. ba, branchial arch; fb, forebrain; ht, heart; lb, limb.

## Supplemrntary Figure 2

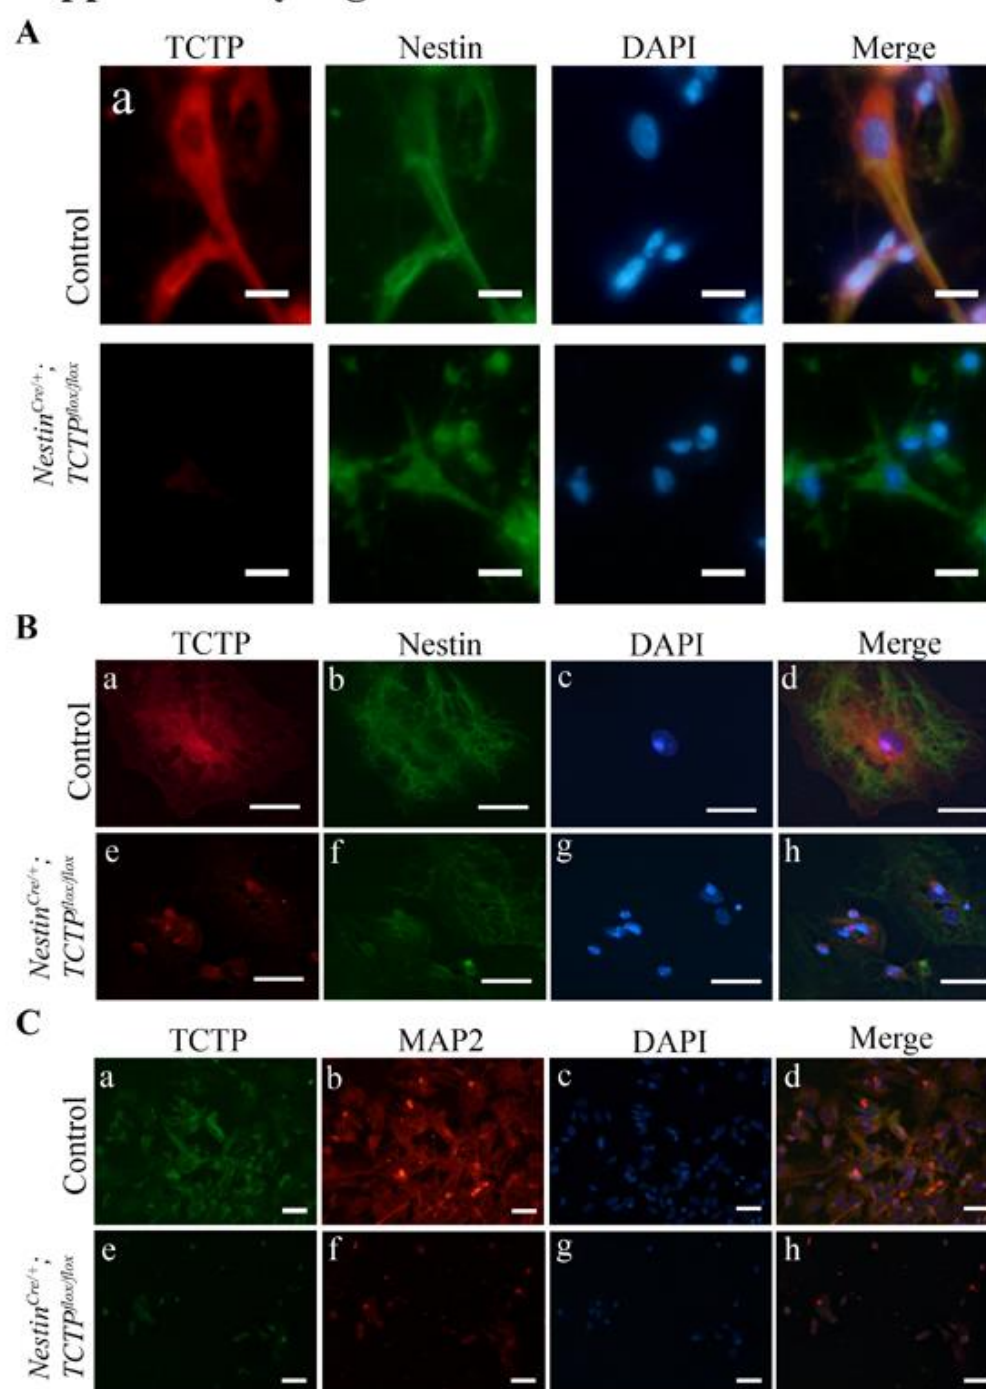

**Supplementary Figure S2.** Expression of proliferating neural precursor (Nestin<sup>+</sup>) and postmitotic neuron (MAP2<sup>+</sup>) markers was detected during critical period of brain development. Double immunofluorescence staining for TCTP (red) and Nestin (green) in primary culture from control and **TCTP-cKO** mice at (A) E16.5 and (B) E14.5. (C) Double immunofluorescence staining of MAP2 (red) and TCTP (green) in primary culture from control and *Nestin<sup>Cre/+</sup>; TCTP<sup>lox/lox</sup>* mice at E16.5. Scale bars: A, 10  $\mu$ m; B, C, 20  $\mu$ m.

## Supplementary Figure 3

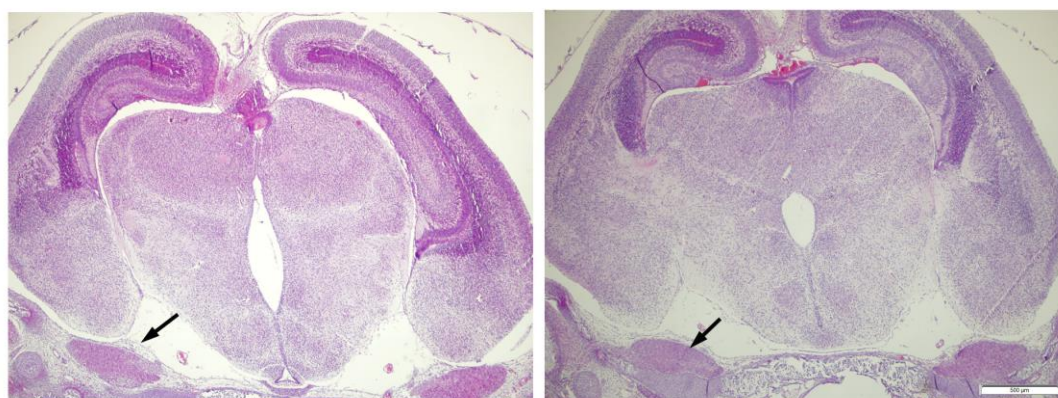

**Control**

**cKO**

**Supplementary Figure S3.** Morphology of brain stem trigeminal ganglion was detected by hematoxylin and eosin stain. Coronal brain sections from control and TCTP cKO pups at E16.5 were stained with hematoxylin and eosin. Scale bars: 500  $\mu$ m. Arrow indicates trigeminal ganglion.

### Supplementary Table S1

TCTP-deficient mice were not rescued by oral administration of 0.2 mL saline containing 15% glucose 2 times per day.

Supplementary Table 1

| Genotype                                      | Time (h) Post administration |    |    |     |     |     |     |     |     |     |
|-----------------------------------------------|------------------------------|----|----|-----|-----|-----|-----|-----|-----|-----|
|                                               | 3h                           | 6h | 9h | 18h | 21h | 24h | 36h | 39h | 43h | 52h |
| Nestin <sup>cre/+</sup> ; TCTP <sup>f/f</sup> | 9                            | 9  | 8  | 7   | 4   | 4   | 3   | 3   | 3   | 0   |
| Nestin <sup>cre/+</sup> ; TCTP <sup>f/+</sup> | 13                           | 13 | 13 | 12  | 12  | 12  | 12  | 11  | 11  | 11  |
| Nestin <sup>+/+</sup> ; TCTP <sup>f/f</sup>   | 7                            | 7  | 7  | 7   | 7   | 7   | 7   | 7   | 7   | 7   |
| Nestin <sup>+/+</sup> ; TCTP <sup>f/+</sup>   | 8                            | 8  | 8  | 8   | 8   | 8   | 8   | 6   | 6   | 6   |

### Supplementary references

- Shen, M.M.; Wang, H.; Leder, P. A differential display strategy identifies Cryptic, a novel EGF-related gene expressed in the axial and lateral mesoderm during mouse gastrulation. *Development (Cambridge, England)* **1997**, *124*, 429-442.
